# Supplementary material for: Determination of polyamines in Arabidopsis thaliana by capillary electrophoresis using salicylaldehyde-5-sulfonate as a derivatizing reagent
Source: Royal Society of Chemistry journal article supplement (doi:10.1039/c3ay26360f), 2013-01-01
Supplement: c3ay26360f.pdf [file c3ay26360f.pdf]

## Supplementary material

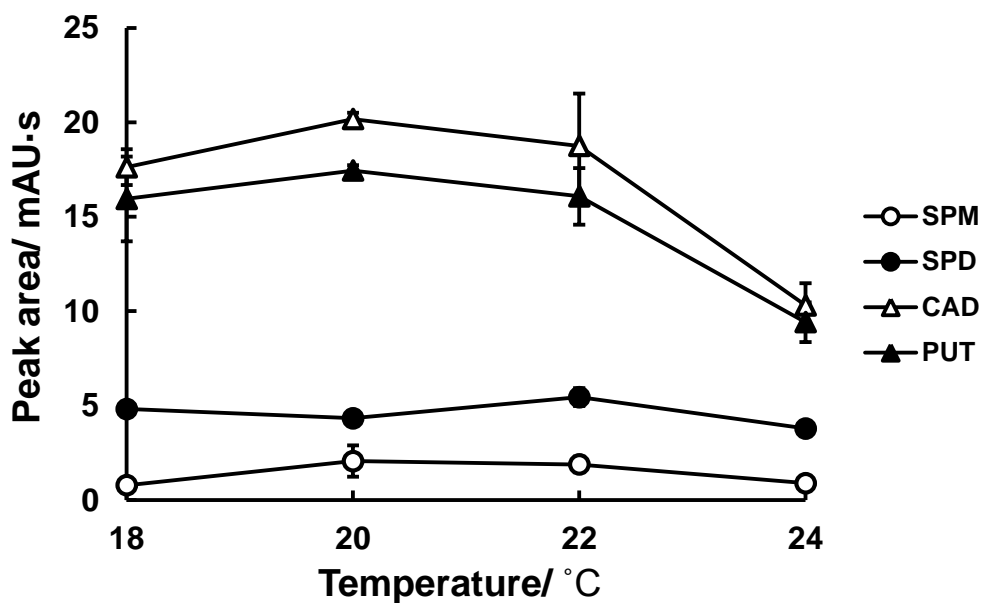

Fig. S1 Effect of temperature on the derivatization reaction.

Migration buffer, 10 mM phosphate buffer (pH 7.8); sample solution; 500  $\mu$ M CAD, PUT, SPD, SPM, and 5 mM SAS in 10 mM phosphate buffer (pH 7.8) containing 60% ethanol; capillary, total length = 64.5 cm, effective length = 56 cm, i.d. = 50  $\mu$ m; injection, 50 mbar for 5 s; applied voltage, 30 kV; detection wavelength, 240 nm; and, capillary temperature, 20 °C. The unit of mAU is the milliabsorbance unit.

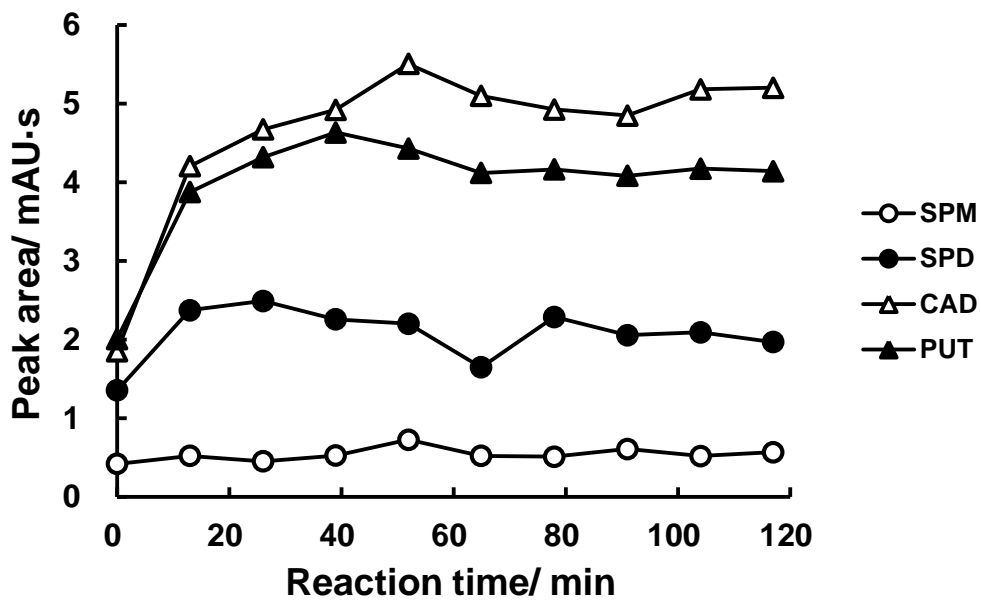

Fig. S2 Effect of reaction time on the derivatization reaction.

Sample solution; 500  $\mu$ M CAD, PUT, SPD, SPM, and 5 mM SAS in 10 mM phosphate buffer (pH 7.8) containing 60% ethanol. Other conditions are similar to Fig. S1.

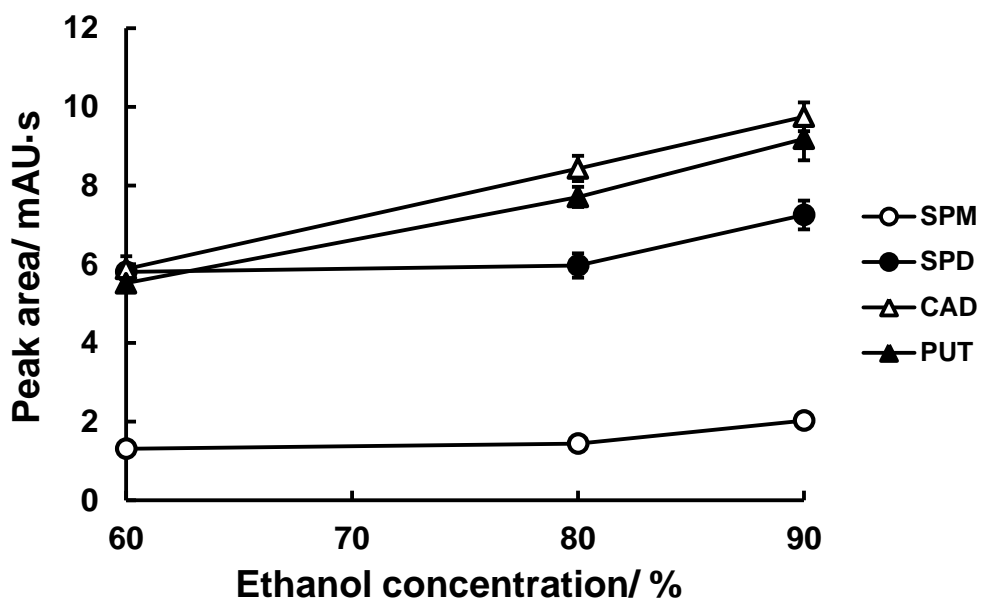

Fig. S3 Effect of ethanol concentration on the derivatization reaction.

Sample solution; 50  $\mu$ M CAD, PUT, SPD, SPM, and 5 mM SAS in 10 mM HEPES buffer (pH 7.8) containing ethanol. Other conditions are similar to Fig. S1.
